# Supplementary material for: Exogenous Probiotics Improve Fermentation Quality, Microflora Phenotypes, and Trophic Modes of Fermented Vegetable Waste for Animal Feed
Source: MDPI journal article supplement (doi:10.3390/microorganisms9030644), 2021-03-19
Supplement: s1 [file s1]

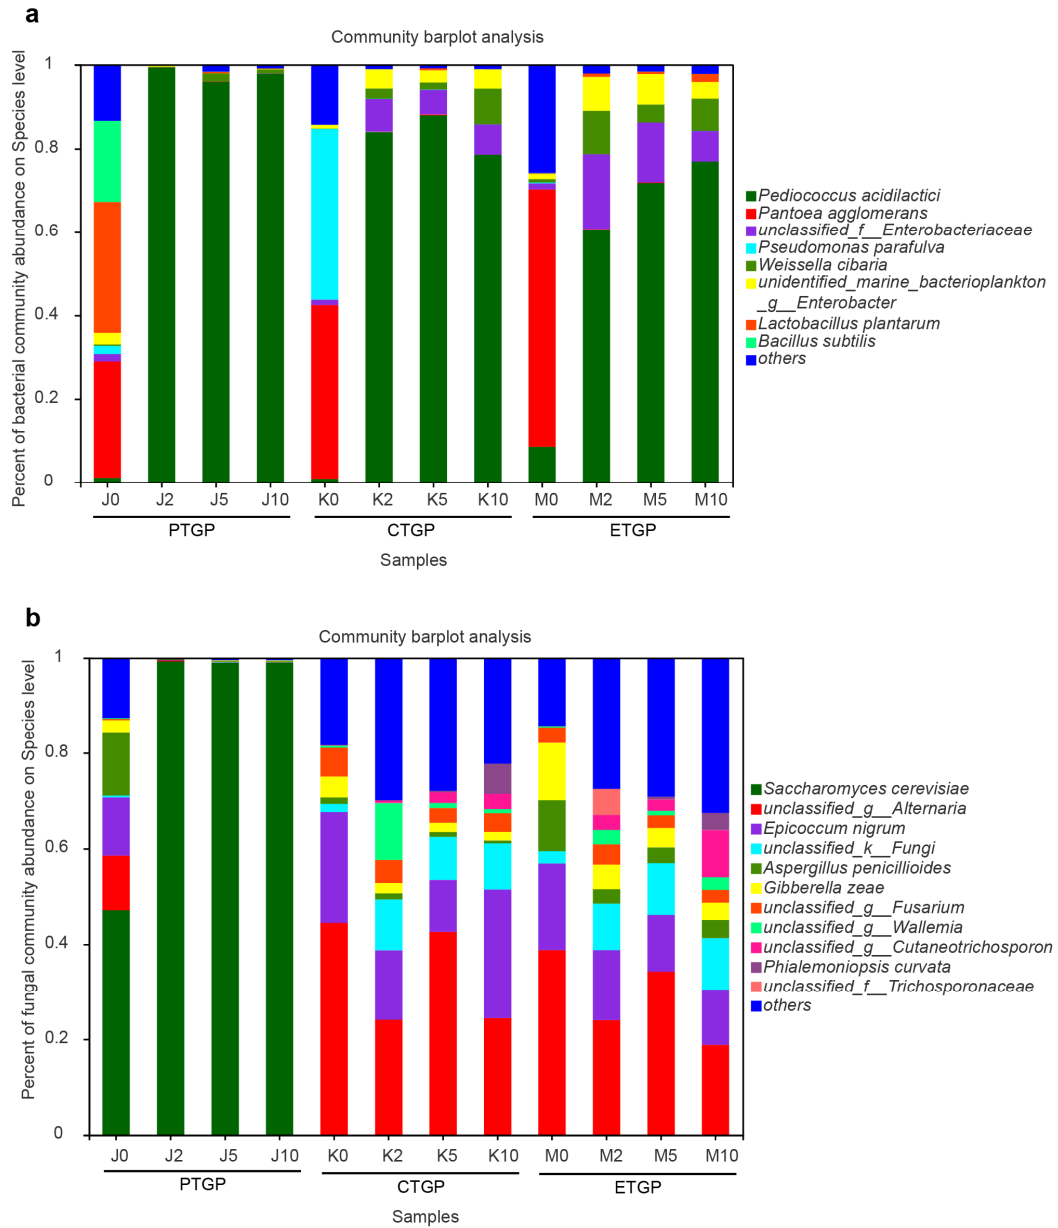

**Figure S1.** The relative abundance of microbial community on species level in vegetable byproduct fermented feed.

PTGP: the probiotics-treatment group; CTGP: the control group; ETGP: the enzymes-treatment group.
