# Supplementary material for: Exogenous Probiotics Improve Fermentation Quality, Microflora Phenotypes, and Trophic Modes of Fermented Vegetable Waste for Animal Feed
Source: MDPI journal article supplement (doi:10.3390/microorganisms9030644), 2021-03-19
Supplement: s1 [file s1]

**Table S1** Effect of exogenous additives and fermentation time on  $\alpha$  diversity indicators of fermented feed.

| $\alpha$ index | Group | Day 0                                 | Day 2          | Day 5          | Day 10        |
|----------------|-------|---------------------------------------|----------------|----------------|---------------|
| Shanon         | PTGP  | 2.12 <sup>a</sup> / 1.99 <sup>b</sup> | 0.05 / 0.06    | 0.24 / 0.09    | 0.15 / 0.09   |
|                | CTGP  | 1.57 / 2.14                           | 0.66 / 2.87    | 0.55 / 2.59    | 0.81 / 2.65   |
|                | ETGP  | 1.93 / 2.19                           | 1.21 / 3.04    | 0.97 / 2.81    | 0.91 / 3.17   |
| Chao1          | PTGP  | 131.05 / 264.20                       | 10.00 / 49.14  | 24.50 / 56.13  | 17.50 / 50.00 |
|                | CTGP  | 85.40 / 207.48                        | 20.00 / 119.50 | 14.60 / 148.25 | 17.67 / 89.25 |
|                | ETGP  | 92.83 / 165.77                        | 13.50 / 118.00 | 30.00 / 96.20  | 15.00 / 86.50 |
| Coverage       | PTGP  | 0.978 / 0.998                         | 0.998 / 1.000  | 0.996 / 1.000  | 0.997 / 1.000 |
|                | CTGP  | 0.986 / 0.999                         | 0.997 / 1.000  | 0.998 / 1.000  | 0.997 / 1.000 |
|                | ETGP  | 0.990 / 0.999                         | 0.999 / 1.000  | 0.997 / 1.000  | 0.998 / 1.000 |

PTGP: the probiotics-treatment group; CTGP: the control group; ETGP: the enzymes-treatment group.

<sup>a,b</sup>:indicate the  $\alpha$  index for bacterial community and fungal, respectively. Shannon, Chao1, and Coverage indicators indicate diversity, richness, and sequencing accuracy
